# Supplementary material
Source: PubMed Central journal article supplement (PMC8255113)
Supplement: mmc1.pdf [file mmc1.pdf]

**SUPPLEMENTAL TABLE 1.** Conversion from Clinical Classification Codes (CCC) to the modified disease groups used in this study

| Clinical Classification Codes (CCC) |                                                     | Disease groups used in this study |               | Number of persons affected |
|-------------------------------------|-----------------------------------------------------|-----------------------------------|---------------|----------------------------|
| Code                                | Description                                         | Code                              | Description   |                            |
| 1                                   | Tuberculosis                                        | 1                                 | Tuberculosis  | 66                         |
| 5                                   | HIV infection                                       | 2                                 | HIV infection | 15                         |
| 6                                   | Hepatitis                                           | 3                                 | Hepatitis     | 121                        |
| 11                                  | Cancer of head and neck                             | 4                                 | Cancer        | 688                        |
| 12                                  | Cancer of esophagus                                 | 4                                 | Cancer        |                            |
| 13                                  | Cancer of stomach                                   | 4                                 | Cancer        |                            |
| 14                                  | Cancer of colon                                     | 4                                 | Cancer        |                            |
| 15                                  | Cancer of rectum and anus                           | 4                                 | Cancer        |                            |
| 16                                  | Cancer of liver and intrahepatic bile duct          | 4                                 | Cancer        |                            |
| 17                                  | Cancer of pancreas                                  | 4                                 | Cancer        |                            |
| 18                                  | Cancer of other gastrointestinal organs; peritoneum | 4                                 | Cancer        |                            |
| 19                                  | Cancer of bronchus; lung                            | 4                                 | Cancer        |                            |
| 20                                  | Cancer; other respiratory and intrathoracic         | 4                                 | Cancer        |                            |
| 21                                  | Cancer of bone and connective tissue                | 4                                 | Cancer        |                            |
| 22                                  | Melanomas of skin                                   | 4                                 | Cancer        |                            |
| 23                                  | Other non-epithelial cancer of skin                 | 4                                 | Cancer        |                            |
| 32                                  | Cancer of bladder                                   | 4                                 | Cancer        |                            |
| 33                                  | Cancer of kidney and renal pelvis                   | 4                                 | Cancer        |                            |
| 34                                  | Cancer of other urinary organs                      | 4                                 | Cancer        |                            |
| 35                                  | Cancer of brain and nervous system                  | 4                                 | Cancer        |                            |
| 36                                  | Cancer of thyroid                                   | 4                                 | Cancer        |                            |
| 37                                  | Hodgkin's disease                                   | 4                                 | Cancer        |                            |
| 38                                  | Non-Hodgkin's lymphoma                              | 4                                 | Cancer        |                            |
| 39                                  | Leukemias                                           | 4                                 | Cancer        |                            |
| 40                                  | Multiple myeloma                                    | 4                                 | Cancer        |                            |
| 41                                  | Cancer; other and unspecified primary               | 4                                 | Cancer        |                            |
| 42                                  | Secondary malignancies                              | 4                                 | Cancer        |                            |
| 43                                  | Malignant neoplasm without specification of site    | 4                                 | Cancer        |                            |
| 24                                  | Cancer of breast                                    | 4                                 | Cancer        |                            |
| 25                                  | Cancer of uterus                                    | 4                                 | Cancer        |                            |
| 26                                  | Cancer of cervix                                    | 4                                 | Cancer        |                            |
| 27                                  | Cancer of ovary                                     | 4                                 | Cancer        |                            |
| 28                                  | Cancer of other female genital organs               | 4                                 | Cancer        |                            |
| 29                                  | Cancer of prostate                                  | 4                                 | Cancer        |                            |
| 30                                  | Cancer of testis                                    | 4                                 | Cancer        |                            |
| 31                                  | Cancer of other male genital organs                 | 4                                 | Cancer        |                            |

**SUPPLEMENTAL TABLE 1 (continued).** Conversion from Clinical Classification Codes (CCC) to the modified disease groups used in this study

| Clinical Classification Codes (CCC) |                                                                | Disease groups used in this study |                                                 | Number of persons affected |
|-------------------------------------|----------------------------------------------------------------|-----------------------------------|-------------------------------------------------|----------------------------|
| Code                                | Description                                                    | Code                              | Description                                     |                            |
| 48                                  | Thyroid disorders                                              | 5                                 | Thyroid disorders                               | 761                        |
| 49                                  | Diabetes mellitus without complication                         | 6                                 | Diabetes                                        | 1,460                      |
| 50                                  | Diabetes mellitus with complications                           | 6                                 | Diabetes                                        |                            |
| 51                                  | Other endocrine disorders                                      | 7                                 | Other endocrine disorders                       | 2,574                      |
| 58                                  | Other nutritional disorders                                    | 7                                 | Other endocrine disorders                       |                            |
| 53                                  | Disorders of lipid metabolism                                  | 8                                 | Disorders of lipid metabolism                   | 1,662                      |
| 54                                  | Gout and other crystal arthropathies                           | 9                                 | Gout and other crystal arthropathies            | 188                        |
| 56                                  | Cystic fibrosis                                                | 10                                | Cystic fibrosis                                 | 3                          |
| 59                                  | Deficiency and other anemia                                    | 11                                | Deficiency and other anemia                     | 870                        |
| 61                                  | Sickle cell anemia                                             | 12                                | Sickle cell anemia                              | 0                          |
| 62                                  | Coagulation and hemorrhagic disorders                          | 13                                | Coagulation and hemorrhagic disorders           | 0                          |
| 63                                  | Diseases of white blood cells                                  | 14                                | Hematologic other disorders                     | 674                        |
| 64                                  | Other hematologic conditions                                   | 14                                | Hematologic other disorders                     |                            |
| 79                                  | Parkinson`s disease                                            | 15                                | Chronic neurologic disorders                    | 2,090                      |
| 80                                  | Multiple sclerosis                                             | 15                                | Chronic neurologic disorders                    |                            |
| 81                                  | Other hereditary and degenerative nervous system conditions    | 15                                | Chronic neurologic disorders                    |                            |
| 95                                  | Other nervous system disorders                                 | 15                                | Chronic neurologic disorders                    |                            |
| 653                                 | Delirium, dementia, and amnestic and other cognitive disorders | 15                                | Chronic neurologic disorders                    |                            |
| 82                                  | Paralysis                                                      | 16                                | Paralysis                                       | 64                         |
| 83                                  | Epilepsy; convulsions                                          | 17                                | Epilepsy; convulsions                           | 164                        |
| 84                                  | Headache; including migraine                                   | 18                                | Headaches; including migraine                   | 1,817                      |
| 93                                  | Conditions associated with dizziness or vertigo                | 19                                | Conditions associated with dizziness or vertigo | 1,060                      |
| 96                                  | Heart valve disorders                                          | 20                                | Heart valve disorders                           | 429                        |
| 98                                  | Essential hypertension                                         | 21                                | Hypertension                                    | 1,544                      |
| 99                                  | Hypertension with complications and secondary hypertension     | 21                                | Hypertension                                    |                            |
| 101                                 | Coronary atherosclerosis and other heart disease               | 22                                | Ischemic heart disease                          | 584                        |
| 104                                 | Other and ill-defined heart disease                            | 22                                | Ischemic heart disease                          |                            |
| 103                                 | Pulmonary heart disease                                        | 23                                | Heart failure                                   | 308                        |
| 108                                 | Congestive heart failure; nonhypertensive                      | 23                                | Heart failure                                   |                            |
| 105                                 | Conduction disorders                                           | 24                                | Arrhythmias                                     | 1,673                      |
| 106                                 | Cardiac dysrhythmias                                           | 24                                | Arrhythmias                                     |                            |
| 110                                 | Occlusion or stenosis of precerebral arteries                  | 25                                | Central nervous system vascular ischemia        | 102                        |
| 112                                 | Transient cerebral ischemia                                    | 25                                | Central nervous system vascular ischemia        |                            |
| 114                                 | Peripheral and visceral atherosclerosis                        | 26                                | Peripheral and central vascular disorders       | 359                        |
| 115                                 | Aortic; peripheral; and visceral artery aneurysms              | 26                                | Peripheral and central vascular disorders       |                            |
| 116                                 | Aortic and peripheral arterial embolism or thrombosis          | 26                                | Peripheral and central vascular disorders       |                            |

**SUPPLEMENTAL TABLE 1 (continued).** Conversion from Clinical Classification Codes (CCC) to the modified disease groups used in this study

| Clinical Classification Codes (CCC) |                                                                 | Disease groups used in this study |                                                              | Number of persons affected |
|-------------------------------------|-----------------------------------------------------------------|-----------------------------------|--------------------------------------------------------------|----------------------------|
| Code                                | Description                                                     | Code                              | Description                                                  |                            |
| 119                                 | Varicose veins of lower extremity                               | 27                                | Peripheral venous disorders                                  | 683                        |
| 120                                 | Hemorrhoids                                                     | 27                                | Peripheral venous disorders                                  |                            |
| 121                                 | Other diseases of veins and lymphatics                          | 27                                | Peripheral venous disorders                                  |                            |
| 127                                 | Chronic obstructive pulmonary disease and bronchiectasis        | 28                                | Obstructive pulmonary disorders                              | 668                        |
| 132                                 | Lung disease due to external agents                             | 28                                | Obstructive pulmonary disorders                              |                            |
| 128                                 | Asthma                                                          | 29                                | Asthma                                                       | 777                        |
| 134                                 | Other upper respiratory disease                                 | 30                                | Other upper respiratory tract disease                        | 1,949                      |
| 138                                 | Esophageal disorders                                            | 31                                | Esophageal disorders                                         | 1,334                      |
| 139                                 | Gastroduodenal ulcer (except hemorrhage)                        | 32                                | Gastric and duodenal ulcer                                   | 294                        |
| 141                                 | Other disorders of stomach and duodenum                         | 32                                | Gastric and duodenal ulcer                                   |                            |
| 144                                 | Regional enteritis and ulcerative colitis                       | 33                                | Bowel disorders                                              | 730                        |
| 146                                 | Diverticulosis and diverticulitis                               | 33                                | Bowel disorders                                              |                            |
| 147                                 | Anal and rectal conditions                                      | 33                                | Bowel disorders                                              |                            |
| 149                                 | Biliary tract disease                                           | 34                                | Biliary and liver disorders                                  | 767                        |
| 151                                 | Other liver diseases                                            | 34                                | Biliary and liver disorders                                  |                            |
| 158                                 | Chronic kidney disease                                          | 35                                | Chronic kidney disease                                       | 344                        |
| 162                                 | Other diseases of bladder and urethra                           | 36                                | Other diseases of bladder and urethra                        | 172                        |
| 198                                 | Other inflammatory condition of skin                            | 37                                | Skin disorders                                               | 3,473                      |
| 200                                 | Other skin disorders                                            | 37                                | Skin disorders                                               |                            |
| 202                                 | Rheumatoid arthritis and related disease                        | 38                                | Rheumatoid arthritis and related disease                     | 131                        |
| 203                                 | Osteoarthritis                                                  | 39                                | Osteoarthritis, joint disorders                              | 3,084                      |
| 204                                 | Other non-traumatic joint disorders                             | 39                                | Osteoarthritis, joint disorders                              |                            |
| 205                                 | Spondylosis; intervertebral disc disorders; other back problems | 40                                | Back problems                                                | 2,466                      |
| 206                                 | Osteoporosis                                                    | 41                                | Osteoporosis                                                 | 186                        |
| 210                                 | Systemic lupus erythematosus and connective tissue disorders    | 42                                | Systemic lupus erythematosus and connective tissue disorders | 55                         |
| 651                                 | Anxiety disorder                                                | 43                                | Anxiety, depression, bipolar disorders                       | 2,337                      |
| 657                                 | Mood disorders (bipolar disorders and depressive disorders)     | 43                                | Anxiety, depression, bipolar disorders                       |                            |
| 652                                 | Attention-deficit, conduct, and disruptive behavior disorder    | 44                                | Attention-deficit, conduct, and disruptive behavior disorder | 443                        |
| 654                                 | Developmental disorders                                         | 45                                | Developmental disorders                                      | 230                        |
| 658                                 | Personality disorders                                           | 46                                | Personality disorders                                        | 82                         |
| 659                                 | Schizophrenia and other psychotic disorders                     | 47                                | Affective disorders, schizophrenia, other psychoses          | 64                         |
| 660                                 | Alcohol-related disorders                                       | 48                                | Substance use disorders                                      | 1,022                      |
| 661                                 | Substance-related disorders                                     | 48                                | Substance use disorders                                      |                            |
