# Supplementary material
Source: PubMed Central journal article supplement (PMC8255113)
Supplement: mmc3.pdf [file mmc3.pdf]

**SUPPLEMENTAL TABLE 3.** Sensitivity analyses for the risk of severe COVID-19 infection (hospitalization or death due to COVID-19). Analyses include persons with chronic conditions defined 5 years prior to diagnosis date, 18 months prior to diagnosis date, and excluding persons with <6 months of information prior to diagnosis date. The reference population for each analysis is all persons without the chronic condition. Conditions which remained significant after adjustment are highlighted in bold type.

| Condition                                                    | Chronic diseases defined 5 years prior to diagnosis<br>N=9,928 |                                      | Chronic diseases defined 18 months prior to diagnosis<br>N=9,928 |                                       | Excluding persons with <6 months of information prior to diagnosis<br>N=8,537 |                                      |
|--------------------------------------------------------------|----------------------------------------------------------------|--------------------------------------|------------------------------------------------------------------|---------------------------------------|-------------------------------------------------------------------------------|--------------------------------------|
|                                                              | N (%) at risk                                                  | HR (95% CI) <sup>a</sup>             | N (%) at risk                                                    | HR (95% CI) <sup>a</sup>              | N (%) at risk                                                                 | HR (95% CI) <sup>a</sup>             |
| Affective disorders, schizophrenia, other psychoses          | 64 (0.6)                                                       | <b>3.53 (2.21, 5.62)<sup>b</sup></b> | <50                                                              | --                                    | 64 (0.8)                                                                      | <b>3.55 (2.23, 5.66)<sup>b</sup></b> |
| Anxiety, depression, bipolar disorders                       | 2,337 (23.5)                                                   | <b>1.49 (1.23, 1.81)<sup>b</sup></b> | 1,447 (14.6)                                                     | <b>1.39 (1.12, 1.73)<sup>b</sup></b>  | 2,330 (27.3)                                                                  | <b>1.54 (1.27, 1.87)<sup>b</sup></b> |
| Arrhythmias                                                  | 1,673 (16.9)                                                   | <b>1.72 (1.40, 2.10)<sup>b</sup></b> | 914 (9.2)                                                        | <b>1.89 (1.53, 2.32)<sup>b</sup></b>  | 1,666 (19.5)                                                                  | <b>1.77 (1.44, 2.18)<sup>b</sup></b> |
| Asthma                                                       | 777 (7.8)                                                      | <b>1.38 (1.06, 1.80)<sup>b</sup></b> | 443 (4.5)                                                        | <b>1.48 (1.08, 2.03)<sup>b</sup></b>  | 776 (9.1)                                                                     | <b>1.41 (1.08, 1.84)<sup>b</sup></b> |
| Attention-deficit, conduct, and disruptive behavior disorder | 443 (4.5)                                                      | 1.35 (0.77, 2.37)                    | 235 (2.4)                                                        | 0.44 (0.11, 1.76)                     | 443 (5.2)                                                                     | 1.41 (0.81, 2.47)                    |
| Back problems                                                | 2,466 (24.8)                                                   | <b>1.53 (1.27, 1.85)<sup>b</sup></b> | 1,115 (11.2)                                                     | <b>1.28 (1.04, 1.59)<sup>b</sup></b>  | 2,461 (28.8)                                                                  | <b>1.60 (1.32, 1.94)<sup>b</sup></b> |
| Biliary and liver disorders                                  | 767 (7.7)                                                      | <b>2.07 (1.70, 2.54)<sup>b</sup></b> | 298 (3.0)                                                        | <b>1.99 (1.52, 2.60)<sup>b</sup></b>  | 762 (8.9)                                                                     | <b>2.13 (1.74, 2.61)<sup>b</sup></b> |
| Bowel disorders                                              | 730 (7.4)                                                      | <b>1.28 (1.02, 1.59)<sup>b</sup></b> | 284 (2.9)                                                        | <b>1.39 (1.02, 1.90)<sup>b</sup></b>  | 729 (8.5)                                                                     | <b>1.29 (1.04, 1.61)<sup>b</sup></b> |
| Cancer                                                       | 688 (6.9)                                                      | 1.24 (0.98, 1.56)                    | 443 (4.5)                                                        | 1.13 (0.87, 1.48)                     | 687 (8.1)                                                                     | 1.24 (0.99, 1.57)                    |
| Central nervous system vascular ischemia                     | 102 (1.0)                                                      | 1.28 (0.86, 1.90)                    | 50 (0.5)                                                         | 1.28 (0.77, 2.13)                     | 101 (1.2)                                                                     | 1.28 (0.86, 1.90)                    |
| Chronic kidney disease                                       | 344 (3.5)                                                      | <b>1.89 (1.48, 2.40)<sup>b</sup></b> | 296 (3.0)                                                        | <b>1.89 (1.49, 2.41)<sup>b</sup></b>  | 344 (4.0)                                                                     | <b>1.88 (1.48, 2.40)<sup>b</sup></b> |
| Chronic neurologic disorders                                 | 2,090 (21.1)                                                   | <b>1.76 (1.45, 2.15)<sup>b</sup></b> | 1,001 (10.1)                                                     | <b>1.73 (1.41, 2.12)<sup>b</sup></b>  | 2,084 (24.4)                                                                  | <b>1.84 (1.51, 2.25)<sup>b</sup></b> |
| Conditions associated with dizziness or vertigo              | 1,060 (10.7)                                                   | <b>1.28 (1.04, 1.59)<sup>b</sup></b> | 428 (4.3)                                                        | <b>1.56 (1.18, 2.07)<sup>b</sup></b>  | 1,057 (12.4)                                                                  | <b>1.31 (1.06, 1.62)<sup>b</sup></b> |
| Deficiency and other anemia                                  | 870 (8.8)                                                      | <b>1.76 (1.43, 2.17)<sup>b</sup></b> | 412 (4.2)                                                        | <b>1.93 (1.51, 2.45)<sup>b</sup></b>  | 869 (10.2)                                                                    | <b>1.79 (1.45, 2.21)<sup>b</sup></b> |
| Developmental disorders                                      | 132 (1.3)                                                      | <b>3.05 (1.67, 5.57)<sup>b</sup></b> | 55 (0.6)                                                         | <b>3.85 (1.43, 10.37)<sup>b</sup></b> | 131 (1.5)                                                                     | <b>3.14 (1.72, 5.73)<sup>b</sup></b> |
| Diabetes                                                     | 1,460 (14.7)                                                   | <b>1.38 (1.13, 1.69)<sup>b</sup></b> | 1,077 (10.9)                                                     | <b>1.50 (1.23, 1.83)<sup>b</sup></b>  | 1,460 (17.1)                                                                  | <b>1.43 (1.17, 1.75)<sup>b</sup></b> |
| Disorders of lipid metabolism                                | 1,662 (16.7)                                                   | <b>1.50 (1.20, 1.86)<sup>b</sup></b> | 1,201 (11.1)                                                     | <b>1.35 (1.10, 1.66)<sup>b</sup></b>  | 1,660 (19.4)                                                                  | <b>1.56 (1.25, 1.95)<sup>b</sup></b> |
| Epilepsy, convulsions                                        | 164 (1.7)                                                      | <b>2.05 (1.36, 3.10)<sup>b</sup></b> | 86 (0.9)                                                         | <b>3.07 (1.86, 5.07)<sup>b</sup></b>  | 163 (1.9)                                                                     | <b>2.08 (1.38, 3.15)<sup>b</sup></b> |
| Esophageal disorders                                         | 1,334 (13.4)                                                   | <b>1.38 (1.13, 1.67)<sup>b</sup></b> | 695 (7.0)                                                        | <b>1.51 (1.20, 1.88)<sup>b</sup></b>  | 1,331 (15.6)                                                                  | <b>1.41 (1.16, 1.72)<sup>b</sup></b> |
| Gastric and duodenal ulcer                                   | 294 (3.0)                                                      | <b>1.50 (1.10, 2.05)<sup>b</sup></b> | 111 (1.1)                                                        | 1.43 (0.89, 2.30)                     | 293 (3.4)                                                                     | <b>1.53 (1.12, 2.09)<sup>b</sup></b> |
| Gout and other crystal arthropathies                         | 188 (1.9)                                                      | 1.17 (0.85, 1.62)                    | 94 (1.0)                                                         | 1.20 (0.79, 1.83)                     | 187 (2.2)                                                                     | 1.18 (0.86, 1.63)                    |
| Headache                                                     | 1,817 (18.3)                                                   | <b>1.56 (1.28, 1.91)<sup>b</sup></b> | 763 (7.7)                                                        | <b>1.83 (1.41, 2.38)<sup>b</sup></b>  | 1,812 (21.2)                                                                  | <b>1.62 (1.32, 1.99)<sup>b</sup></b> |

<sup>a</sup> All hazard ratios are adjusted for age (continuous variable within each age stratum), sex, race, ethnicity, BMI category, and smoking status.

<sup>b</sup> Hazard ratio is statistically significant after adjusting for multiple comparisons

**SUPPLEMENTAL TABLE 3 (continued).** Sensitivity analyses for the risk of severe COVID-19 infection (hospitalization or death due to COVID-19). Analyses include persons with chronic conditions defined 5 years prior to diagnosis date, 18 months prior to diagnosis date, and excluding persons with <6 months of information prior to diagnosis date. The reference population for each analysis is all persons without the chronic condition. Conditions which remained significant after adjustment are highlighted in bold type.

| Condition                                                    | Chronic diseases defined 5 years prior to diagnosis<br>N=9,928 |                                      | Chronic diseases defined 18 months prior to diagnosis<br>N=9,928 |                                      | Excluding persons with <6 months of information prior to diagnosis<br>N=8,537 |                                      |
|--------------------------------------------------------------|----------------------------------------------------------------|--------------------------------------|------------------------------------------------------------------|--------------------------------------|-------------------------------------------------------------------------------|--------------------------------------|
|                                                              | N (%) at risk                                                  | HR (95% CI) <sup>a</sup>             | N (%) at risk                                                    | HR (95% CI) <sup>a</sup>             | N (%) at risk                                                                 | HR (95% CI) <sup>a</sup>             |
| Heart failure                                                | 308 (3.1)                                                      | <b>2.44 (1.93, 3.09)<sup>b</sup></b> | 202 (2.0)                                                        | <b>2.51 (1.94, 3.25)<sup>b</sup></b> | 307 (3.6)                                                                     | <b>2.44 (1.92, 3.09)<sup>b</sup></b> |
| Heart valve disorders                                        | 429 (4.3)                                                      | <b>1.46 (1.14, 1.87)<sup>b</sup></b> | 222 (2.2)                                                        | <b>1.51 (1.12, 2.04)<sup>b</sup></b> | 428 (5.0)                                                                     | <b>1.47 (1.15, 1.88)<sup>b</sup></b> |
| Hematologic disorders                                        | 674 (6.8)                                                      | <b>2.24 (1.82, 2.76)<sup>b</sup></b> | 291 (2.9)                                                        | <b>1.94 (1.46, 2.56)<sup>b</sup></b> | 671 (7.9)                                                                     | <b>2.29 (1.85, 2.82)<sup>b</sup></b> |
| Hepatitis                                                    | 121 (1.2)                                                      | <b>1.69 (1.08, 2.65)<sup>b</sup></b> | 62 (0.6)                                                         | 1.69 (0.96, 2.98)                    | 121 (1.4)                                                                     | <b>1.75 (1.12, 2.73)<sup>b</sup></b> |
| Hypertension                                                 | 1,544 (15.6)                                                   | <b>1.50 (1.20, 1.88)<sup>b</sup></b> | 1,228 (12.4)                                                     | <b>1.33 (1.07, 1.65)<sup>b</sup></b> | 1,543 (18.1)                                                                  | <b>1.56 (1.24, 1.97)<sup>b</sup></b> |
| Ischemic heart disease                                       | 584 (5.9)                                                      | <b>1.86 (1.50, 2.31)<sup>b</sup></b> | 359 (3.6)                                                        | <b>1.81 (1.43, 2.30)<sup>b</sup></b> | 582 (6.8)                                                                     | <b>1.88 (1.51, 2.35)<sup>b</sup></b> |
| Obstructive pulmonary disorders                              | 668 (6.7)                                                      | <b>1.76 (1.42, 2.19)<sup>b</sup></b> | 291 (2.9)                                                        | <b>1.98 (1.53, 2.56)<sup>b</sup></b> | 668 (7.8)                                                                     | <b>1.78 (1.43, 2.22)<sup>b</sup></b> |
| Osteoarthritis, joint disorders                              | 3,084 (31.1)                                                   | 1.06 (0.87, 1.29)                    | 1,382 (13.9)                                                     | 1.08 (0.88, 1.32)                    | 3,078 (36.1)                                                                  | 1.10 (0.90, 1.35)                    |
| Osteoporosis                                                 | 186 (1.9)                                                      | <b>1.69 (1.25, 2.30)<sup>b</sup></b> | 97 (1.0)                                                         | <b>2.18 (1.52, 3.13)<sup>b</sup></b> | 186 (2.2)                                                                     | <b>1.68 (1.24, 2.28)<sup>b</sup></b> |
| Other diseases of bladder and urethra                        | 172 (1.7)                                                      | 1.41 (1.00, 1.98)                    | 91 (0.9)                                                         | <b>1.89 (1.22, 2.93)<sup>b</sup></b> | 172 (2.0)                                                                     | 1.41 (1.00, 1.99)                    |
| Other endocrine disorders                                    | 2,574 (25.9)                                                   | <b>1.67 (1.37, 2.05)<sup>b</sup></b> | 1,422 (14.3)                                                     | <b>1.65 (1.35, 2.01)<sup>b</sup></b> | 2,565 (30.1)                                                                  | <b>1.73 (1.41, 2.13)<sup>b</sup></b> |
| Other upper respiratory tract disease                        | 1,949 (19.6)                                                   | <b>1.29 (1.06, 1.57)<sup>b</sup></b> | 701 (7.1)                                                        | <b>1.38 (1.06, 1.78)<sup>b</sup></b> | 1,947 (22.8)                                                                  | <b>1.33 (1.09, 1.61)<sup>b</sup></b> |
| Paralysis                                                    | 64 (0.6)                                                       | <b>2.04 (1.25, 3.33)<sup>b</sup></b> | <50                                                              | --                                   | 63 (0.7)                                                                      | <b>2.06 (1.26, 3.36)<sup>b</sup></b> |
| Peripheral and central vascular disorders                    | 359 (3.6)                                                      | <b>1.56 (1.23, 1.99)<sup>b</sup></b> | 207 (2.1)                                                        | <b>1.70 (1.29, 2.24)<sup>b</sup></b> | 358 (4.2)                                                                     | <b>1.57 (1.24, 2.00)<sup>b</sup></b> |
| Peripheral venous disorders                                  | 683 (6.9)                                                      | <b>1.32 (1.06, 1.66)<sup>b</sup></b> | 277 (2.8)                                                        | <b>1.40 (1.03, 1.90)<sup>b</sup></b> | 682 (8.0)                                                                     | <b>1.34 (1.07, 1.68)<sup>b</sup></b> |
| Personality disorders                                        | 82 (0.8)                                                       | <b>3.08 (1.68, 5.65)<sup>b</sup></b> | <50                                                              | --                                   | 82 (1.0)                                                                      | <b>3.12 (1.70, 5.72)<sup>b</sup></b> |
| Rheumatoid arthritis and related disease                     | 131 (1.3)                                                      | 1.11 (0.71, 1.72)                    | 81 (0.8)                                                         | 1.13 (0.65, 1.96)                    | 131 (1.5)                                                                     | 1.11 (0.71, 1.72)                    |
| Skin disorders                                               | 3,473 (35.0)                                                   | 1.13 (0.94, 1.37)                    | 1,627 (16.4)                                                     | 1.23 (1.01, 1.51)                    | 3,464 (40.6)                                                                  | 1.18 (0.98, 1.43)                    |
| Substance use disorders                                      | 1,022 (10.3)                                                   | <b>1.42 (1.09, 1.84)<sup>b</sup></b> | 525 (5.3)                                                        | <b>1.43 (1.03, 2.00)<sup>b</sup></b> | 1,015 (11.9)                                                                  | <b>1.43 (1.10, 1.86)<sup>b</sup></b> |
| Systemic lupus erythematosus and connective tissue disorders | 55 (0.6)                                                       | 1.78 (0.92, 3.45)                    | <50                                                              | --                                   | 55 (0.6)                                                                      | 1.78 (0.92, 3.46)                    |
| Thyroid disorders                                            | 761 (7.7)                                                      | <b>1.67 (1.34, 2.09)<sup>b</sup></b> | 513 (5.2)                                                        | <b>1.71 (1.34, 2.18)<sup>b</sup></b> | 761 (8.9)                                                                     | <b>1.68 (1.35, 2.11)<sup>b</sup></b> |
| Tuberculosis                                                 | 66 (0.7)                                                       | 1.81 (0.84, 3.86)                    | <50                                                              | --                                   | 66 (0.8)                                                                      | 1.85 (0.87, 3.96)                    |

<sup>a</sup> All models are adjusted for age (continuous variable within each age stratum), sex, race, ethnicity, BMI category, and smoking status.

<sup>b</sup> Hazard ratio is statistically significant after adjusting for multiple comparisons
